# Supplementary material for: Beyond Technical Feasibility: A Scoping Review of Operational and Strategic Dimensions of Aviation Wastewater Surveillance
Source: Research Square preprint supplement (doi:10.21203/rs.3.rs-8206772/v1), 2026-01-21
Supplement: Supplementary file 1 [file ff3855fa28b3bd5680d04886.docx]

**Supplementary Information**

**Supp 1: Search strategy for PubMed and Embase**

| Concepts | Search terms (PubMed) |
| --- | --- |
| #1  Aviation setting | ("Airplane"[Mesh]) OR ("Airports"[Mesh]) OR ("Air Travel"[Mesh]) OR  (airport*[tw]) OR (airplane*[tw]) OR (airplane*[tw]) OR (“air travel*”[tw]) OR ((plane*[tw]) AND ((travel*[tw]) OR (cabin*[tw]))) OR ((planes[tw]) AND (travel[tw])) OR (aviation[tw]) OR (“international flight”[tw]) OR (“international flights”[tw]) OR (“domestic flight”[tw]) OR (“domestic flights”[tw]) OR (airplane*[tw]) OR (“air transport*”[tw]) OR (airline*[tw]) OR (airliner*[tw]) OR (“long distance flight”[tw]) OR (“long distance flights”[tw]) |
| #2  Public health surveillance | "Public Health Surveillance"[Mesh] OR "Environmental Monitoring"[Mesh] OR  (surveil*[tw]) OR (detect*[tw]) OR (monitor*[tw]) OR (“early warning”[tw]) OR (“ERWAS”[tw]) OR (identif*[tw]) OR (test*[tw]) OR (screen*[tw]) |
| #3  Wastewater | “Wastewater"[MeSH] OR  (wastewater*[tw]) OR ((waste*[tw]) AND (water*[tw])) OR (sewage*[tw]) OR (sewer*[tw]) OR (toilet*[tw]) |
| #4  Pathogens | "Viruses"[Mesh] OR "Communicable Diseases"[Mesh] OR "Bacteria"[Mesh] OR "Epidemics"[Mesh] OR "Pandemics"[Mesh] OR "Disease Outbreaks"[Mesh] OR "Drug Resistance, Microbial"[Mesh] OR  (virus*[tw]) OR (pathogen*[tw]) OR (bacteria*[tw]) OR (“infectious disease*”[tw]) OR (infection*[tw]) OR (SARS-CoV-2[tw]) OR (COVID*[tw]) OR (epidemic*[tw]) OR (pandemic*[tw]) OR ((vector*[tw]) AND (disease*[tw])) OR (outbreak*[tw]) OR (“communicable disease”[tw]) OR (“communicable diseases”[tw]) OR (“antimicrobial resistant”[tw]) OR (“antimicrobial resistance”[tw]) OR (“AMR”[tw]) |
| #5 Final search | #1 AND #2 AND #3 AND #4 |

| Concepts | Search terms (Embase) |
| --- | --- |
| #1  Aviation setting | ‘aviation’/exp OR ‘airport’/exp OR  airport*:ti,ab OR airplane*:ti,ab OR airplane*:ti,ab OR “air travel*”:ti,ab OR (plane*:ti,ab AND (travel*:ti,ab OR cabin*:ti,ab)) OR aviation:ti,ab OR “international flight”:ti,ab OR “international flights”:ti,ab OR “domestic flight”:ti,ab OR “domestic flights”:ti,ab OR “air transport*”:ti,ab OR airline*:ti,ab OR airliner*:ti,ab OR “long distance flight”:ti,ab OR “long distance flights”:ti,ab |
| #2  Public health surveillance | ‘public health surveillance’/exp OR ‘environmental monitoring’/exp OR ‘microorganism detection’/exp OR  surveil*:ti,ab OR detect*:ti,ab OR monitor*:ti,ab OR “early warning”:ti,ab OR ERWAS:ti,ab OR identif*:ti,ab OR test*:ti,ab OR screen*:ti,ab |
| #3  Wastewater | ‘wastewater’/exp OR ‘sewage’/exp OR  wastewater*:ti,ab OR (waste*:ti,ab AND water*:ti,ab) OR sewage*:ti,ab OR sewer*:ti,ab OR toilet*:ti,ab |
| #4  Pathogens | ‘virus’/exp OR ‘communicable disease’/exp OR ‘bacterium’/exp OR ‘epidemic’/exp OR ‘pandemic’/exp OR ‘infectious agent’/exp OR ‘drug resistance’/exp OR ‘antibiotic resistance’/exp OR  virus*:ti,ab OR pathogen*:ti,ab OR bacteria*:ti,ab OR “infectious disease*”:ti,ab OR infection*:ti,ab OR SARS-CoV-2:ti,ab OR COVID*:ti,ab OR epidemic*:ti,ab OR pandemic*:ti,ab OR (vector*:ti,ab AND disease*:ti,ab) OR outbreak*:ti,ab OR “communicable disease”:ti,ab OR “communicable diseases”:ti,ab OR “antimicrobial resistant”:ti,ab OR “antimicrobial resistance”:ti,ab OR AMR:ti,ab |
| #6 Final search | #1 AND #2 AND #3 AND #4 |

**Supp 2: Data extraction protocol** (adapted from van der Drift, et al. [1])

| **Name of item** | **Description of the item** |
| --- | --- |
| *General information* | |
| Name of the lead author | Name of the lead author |
| Year of publication | The year the article was first published |
| *Location* | |
| Country | Country where the study was conducted |
| Airport(s) | Airport or airports where the study was conducted |
| *Author affiliations and partners* | |
| Author Affiliation and acknowledged entities  *One affiliation for each author in the paper.*  *Entities mentioned in the acknowledgments for services provided, other than funding entities, were also classified according to the same criteria.* | Affiliations were classified as:   - **Research Institute***.* This includes academic institutions, as well as public or private research institutes. - **National Public Health Institute***.* Include affiliations that correspond to national public health institutes or equivalent government-affiliated public health agencies. This category applies when the author is clearly part of a national public health authority (e.g., CDC, national institutes, or similar bodies). Local and national governments are coded in another category. - **Regional Public Health Institute.** This applies to public health authorities at local level, which can be affiliated with States, Municipalities. This also includes health services, hospitals, clinics, or direct health care providers. - **National and local governments.** This applies to government agencies or authorities at the national, state, provincial, or local (e.g., city, county, municipal) level. Examples include Ministries and Municipalities. - **International Organization.** This applies to branches or entities directly affiliated with international organizations like the WHO, or the European Union. An example is the Joint Research Centre, a Directorate General of the European Commission. - **Water Authority.** This includes entities responsible for managing wastewater infrastructure, sewer networks, or environmental water services. This category covers public or private utilities that operate airport-connected sewerage systems or provide technical support for wastewater handling. - **Private Implementation Partner**. This includes private companies contracted to support to the project (biotech companies, consulting companies, other private companies providing expertise or logistical resources) - **Airline**. This includes airline involvement or facilitation. - **Airport Authority / Airport Operator**. This includes airport involvement or facilitation. - **Ground Services / Ground Handling Companies.** This includes organizations providing operational support to airplane on the ground, such as cleaning crews or lavatory truck operators. - **Protective Services.** This includes organizations affiliated with the military, police or fire brigades. - **Consortium.** This was chosen for consortia or groupments of scientific interest. Examples include WastewaterSCAN, or the Danish Covid 19 Genome Consortium. - **Other organization.**  This category was used when an entity did not clearly fall into any of the predefined stakeholder groups, or when its role in aviation wastewater surveillance could not be linked to a specific function. |
| International partners (yes/no) | Choose “yes” if one or more authors are affiliated with an institution based in a country different from where the study was conducted. Note that affiliations with international organizations (e.g., WHO, ICAO) do not count as international partners. |
| *Study characteristics* | |
| Aim | Overarching aim of the study as described by the authors. |
| Target pathogen(s) | Include all pathogens that are described in the article. Pathogens were classified as:   - **SARS-CoV-2** (including variants of concern) - **Mpox** - **Antimicrobial resistant bacteria, or resistance genes** - **Poliovirus** - **Predefined set of enteric pathogens** - **Un/semi targeted approaches using metagenomics** (excluding AMR) - **Predefined panel or multiple targets of pathogens** (including respiratory pathogens)   When multiple categories were applicable, the one capturing the broadest diversity of pathogens was used (ex. Studies including both large PCR panels and semi-targeted metagenomic are classified as ‘Metagenomics’). |
| *Sampling process* | |
| Sampling level | - **Airport.**  When the wastewater was sampled at the level of the airport terminal, or a wastewater treatment plant that directly receives airport wastewater. - **Airplane**. When the wastewater was sampled at the level of individual airplanes, or if the wastewater is sampled from service tucks, or at the level of a triturator, but upstream of the airport. - **Both**. if the study collected samples both airport and airplane wastewater (as defined above). |
| Sampling start date(s) | Earliest date a wastewater sample was collected as part of this study. Can include two start dates if the wastewater collection protocol is fragmented in time. |
| Sampling end date(s) | Latest date a wastewater sample was collected as part of this study. Can include two start dates if the wastewater collection protocol is fragmented in time. |
| Sampling campaign length | Calculated as the number of days between the first and last reported sampling dates. When only start and end dates were reported, the sampling was assumed to be continuous over that period. When only months were reported, sampling was assumed to start on the first day of the start month, and end on the first day of the end month. When only a single month was reported without specific days, we assumed sampling spanned that full month. |
| *Analytical performance (for a subset of studies using wastewater from airports and airplanes)* | |
| Comparison of analytical performance | Any insight on capabilities to detect pathogens in airport wastewater compared to airplane wastewater. |
| Lead time compared to clinical surveillance, or municipal wastewater surveillance | Any mention of lead time to detection for the target pathogens using airport or airplane wastewater, or both. Lead time could be relative to clinical surveillance (first clinical detection), or municipal wastewater surveillance. |
| *Operational insight* | |
| Characteristics of the airport | Any mention of how physical characteristics of the airport might have impacted the collection, analysis and reporting process. |
| Challenges | Any mention of challenges faces by the investigators in completing the study, in particular as it is tied to one method of sampling (includes partnerships, access to airports/airplanes, collection, transport, analysis, data sharing, release of the information). |
| *Epidemiological use cases and use of data* | |
| Epidemiological use cases | Rationale for the analysis of airport or airplane wastewater, in terms of the potential to inform public health decision making. |
| Description of public health decision-making  *Categorical, to what extent public health decision-making is mentioned in the article* | Data use was classified as:   - **Data is used. if the study collected samples both airport and airplane wastewater (as defined above).** - **Data is communicated**. if the study collected samples both airport and airplane wastewater (as defined above). - **The theoretical value of data is discussed, but no information is given regarding its use or sharing**. if the study collected samples both airport and airplane wastewater (as defined above). - **The authors do not discuss the potential or actual use of the data generated.** |
| Geographical focus (yes/no) | Choose yes if the authors provide an information on the geographical provenance of the flights for which a wastewater sample was collected. |
| Geographical focus | If the answer was ‘yes’ for the previous question., then mention the geographical origin of flights. |
| Risk informed (yes/no) | Answer yes if the authors mention focusing on flights from a certain origin for sampling, based on suspicions or expectations regarding the presence of pathogens. |
| Comparison with municipal and city-wide wastewater | Answer ‘yes’ if non-aviation wastewater from municipal treatment plants, or other building-level sources, collected as part of the study, |
| Comparisons with clinical data | Answer ‘yes’ if outcomes compared with clinical detection of the target pathogen. |

**Supp 3. Table of studies included in this review with selected characteristics**

| Reference | Identification | Airports | Sampling level | Target pathogen |
| --- | --- | --- | --- | --- |
| Agrawal et al. (2022) | Search strategy | Frankfurt Airport | Airport | SARS-CoV-2 |
| Ahmed et al. (2020) | Search strategy | Brisbane Airport; Sydney Kingsford Smith Airport | Airplane | SARS-CoV-2 |
| Ahmed et al. (2022. a) | Search strategy | Darwin International Airport; Sydney Kingsford Smith Airport | Airplane | SARS-CoV-2 |
| Ahmed et al. (2022. b) | Search strategy | Darwin International Airport | Airplane | SARS-CoV-2 |
| Ahmed et al. (2023) | Search strategy | Darwin International Airport | Airplane | Pre-defined panel of multiple targets |
| Albastaki et al. (2021) | Search strategy | Dubai International Airport | Airplane | SARS-CoV-2 |
| Barber et al. (2025) | Search strategy | Harry Reid International Airport | Airport | SARS-CoV-2 |
| Blaak et al. (2015) | Search strategy | Not mentioned | Airport | AMR bacteria and/or genes |
| de Araújo et al. (2022) | Search strategy | Confins International Airport | Airport | SARS-CoV-2 |
| de Jonge (2022) | Search strategy | Amsterdam Schiphol Airport | Airport | MPox |
| Farkas et al. (2023) | Search strategy | Heathrow Airport, Bristol Airport, Edinburgh Airport | Both | SARS-CoV-2 |
| Feng et al. (2024) | Search strategy | Shanghai Pudong International Airport; Shanghai Hongqiao International Airport | Airport | AMR bacteria and/or genes |
| Friedman et al. (2025) | Search strategy | Washington Dulles International Airport; New York JFK International Airport; San Francisco International Airport; Boston Logan International Airport; Los Angeles International Airport | Airplane | Pre-defined panel of multiple targets |
| Gabrieli et al. (1997) | Search strategy | Leonardo da Vinci Rome Fiumicino Airport | Airport | Multiple enteric pathogens |
| Gashegu et al. (2025) | Search strategy | Kigali International Airport | Airplane | SARS-CoV-2 |
| Heß et al. (2019) | Manually added | Five different airports (de-identified) | Airplane | AMR bacteria and/or genes |
| Hjelmsø et al. (2019) | Search strategy | Copenhagen Airport | Airplane | Metagenomic |
| Knight et al. (2025) | Search strategy | Heathrow Airport, Bristol Airport, Edinburgh Airport | Both | AMR bacteria and/or genes |
| Krzysztoszek et al. (2022) | Search strategy | Warsaw Chopin Airport | Airport | Poliovirus |
| La Rosa et al. (2023) | Search strategy | Leonardo da Vinci Rome Fiumicino Airport | Airport | MPox |
| Lawal et al. (2025) | Manually added  (Pre-print) | Toronto Pearson International Airport | Airplane | SARS-CoV-2 |
| Le Targa et al. (2022) | Search strategy | Marseille Provence Airport | Airplane | SARS-CoV-2 |
| Lee et al. (2025) | Manually added | Incheon International Airport; Donghae Airport, Cheongju Airport, Muan International Airport, Jeju International Airport, Daegu International Airport, Gimhae International Airport | Both | Pre-defined panel of multiple targets |
| Liu et al. (2025) | Search strategy | Darwin International Airport | Airplane | AMR bacteria and/or genes |
| Medema et al. (2020) | Search strategy | Amsterdam Schiphol Airport | Airport | SARS-CoV-2 |
| Morfino et al. (2023) | Search strategy | New York JFK International Airport | Airplane | SARS-CoV-2 |
| Morfino et al. (2025) | Search strategy | Amsterdam Schiphol Airport; Brussels Airport; Frankfurt Airport; Milan Malpensa Airport; two de-identified airports in France and Italy | Both | SARS-CoV-2 |
| Nkambule et al. (2023) | Search strategy | Cape Town International Airport | Airport | SARS-CoV-2 |
| Nordahl Petersen et al. (2015) | Search strategy | Copenhagen Airport | Airplane | Metagenomic |
| Overton et al. (2024) | Search strategy | Toronto Pearson International Airport | Both | SARS-CoV-2 |
| Perez-Zabaleta et al. (2025) | Search strategy | Stockholm Arlanda airport | Both | SARS-CoV-2 |
| Pimenta et al. (2025) | Search strategy | Guadeloupe Maryse Conde Airport | Airplane | AMR bacteria and/or genes |
| Qvesel et al. (2023) | Search strategy | Copenhagen Airport | Airplane | SARS-CoV-2 |
| Rector et al. (2025) | Search strategy  (Pre-print) | Brussels Airport | Airplane | Metagenomic |
| Saravia et al. (2025) | Search strategy | Berlin Brandenburg Airport | Both | SARS-CoV-2 |
| Shieh et al. (1997) | Search strategy | New York JFK International Airport; Los Angeles International Airport | Airplane | Multiple enteric pathogens |
| Sousa-Carmo et al. (2025) | Search strategy | International Airport Sao Paulo-Guarulhos; Viracopos International Airport | Airport | AMR bacteria and/or genes |
| Tang et al. (2024) | Search strategy | Copenhagen Airport | Both | SARS-CoV-2 |
| Tay et al. (2024) | Search strategy | Singapore Changi Airport | Both | Pre-defined panel of multiple targets |
| van der Drift et al. (2024) | Search strategy | Amsterdam Schiphol Airport | Airport | SARS-CoV-2 |
| Zdenkova et al. (2022) | Search strategy | Vaclav Havel Airport Prague | Airport | SARS-CoV-2 |

**Supp 4. Challenges extracted from included studies**

| **Airplane wastewater surveillance challenges** | | |
| --- | --- | --- |
| **Category** | **Challenges** | **References** |
| Wastewater matrix composition | Low dilution, high quantity of solids | [2–9] |
| Deodorant and disinfectant use (blue juice) | [9–17] |
| Cross contamination | Possible cross contamination of service trucks | [3,5,7] |
| Possible cross contamination of airplane tanks | [17–19] |
| Operational challenges related to sampling | Difficulty collecting from sanitary truck (i.e. low volume, wastewater coming out splashing, risk of contamination, requirement for the use of PPE) | [8] |
| Flights might arrive late, or an airplane type might be substituted for another | [20] |
| Extensive sampling of individual airplane could be impractical due to logistics and cost | [5,7,9] |
| Limited availability of sampling trucks | [6] |
| Representativeness of samples | Passengers might not use the lavatory, influencing representativeness of the sample | [3,4,6,7,9,11,12,14,18,21,22] |
| Small number of passengers, low sample size | [21] |
| Limited information on passengers | [10] |
| Interpretation of data and actionability | Impossibility to distinguish travelers with connecting flights | [5,19] |
| Sampling from vacuum truck and deposit sites make tracing flight origin to single flight impossible | [5] |
| Uncertainty in translating surveillance data into an epidemiological framework for public health decision making | [4] |
| Organization challenges | Security checks and difficulties to access the runway | [8] |
| Access to airplane wastewater can require permission of airlines | [8] |
| Any delay in sample extraction can pose an operational and financial risk to an airline | [20] |
| Ethical concerns | Potential ethical with collection of information on a relatively low number of contributors, and concern related to targeting specific passengers or communities | [7,20] |
| Concerns relating to data motivating discriminatory travel restrictions or negative impacts on regional tourism. This could motivate airports and airlines restrict access to its wastewater infrastructure | [7] |

| **Airport wastewater surveillance challenges** | | |
| --- | --- | --- |
| **Category** | **Challenges** | **References** |
| Interpretation of data and representativeness | Airplane wastewater mixed with terminal wastewater, making interpretation of the data difficult without data on passengers and airport staff (sometimes including inbound and outbound passengers) | [5,6,22,24–28] |
| In some cases, airplane wastewater is disposed of separately, so terminal wastewater does not capture incoming passengers | [25] |
| No data on population catchment to put in perspective with clinical trends or flight origins | [8,25,26,29,30] |
| Ability to capture pathogens of interest | If sample frequency is low, the transient nature of the population can lead to intermittent detection, providing a snapshot rather than a full picture | [26,27,31] |
| Difficult to know from which period the sample originated | [8] |
| Absence of wastewater flow measurement for normalization | [30] |
| Changing ratios between long and short flights as well as flight types can influence the ability to detect pathogens | [27] |
| Structure | Terminal wastewater can be difficult to access due to position of manholes, and it might not possible to stir or homogenize | [8] |
| Need for a detailed mapping of the wastewater infrastructure in the airport | [8] |
| Operational | Restricted site access, security permissions, and limited ability to collect repeated samples over time, leading to a very small dataset. | [24] |
| Degradation of RNA | In the sewers, heat and precipitations can lead to the degradation or dilution of genetic material | [32] |
| Accumulation in biofilms in longer sewer lines can lead to lower detection rates further from the source | [5] |

**References**

[1] van der Drift A-MR, Welling A, Arntzen V, Nagelkerke E, van der Beek RFHJ, de Roda Husman AM. Wastewater surveillance studies on pathogens and their use in public health decision-making: a scoping review. Sci Total Environ 2025;993:179982. https://doi.org/10.1016/j.scitotenv.2025.179982.

[2] Shieh Y-SC, Baric RS, Sobsey MD. Detection of low levels of enteric viruses in metropolitan and airplane sewage. Appl Environ Microbiol 1997;63:4401–7. https://doi.org/10.1128/aem.63.11.4401-4407.1997.

[3] Ahmed W, Bivins A, Simpson SL, Bertsch PM, Ehret J, Hosegood I, et al. Wastewater surveillance demonstrates high predictive value for COVID-19 infection on board repatriation flights to Australia. Environ Int 2022;158:106938. https://doi.org/10.1016/j.envint.2021.106938.

[4] Ahmed W, Smith WJM, Tiwari A, Bivins A, Simpson SL. Unveiling indicator, enteric, and respiratory viruses in aircraft lavatory wastewater using adsorption-extraction and Nanotrap® Microbiome A Particles workflows. Sci Total Env 2023;896:165007. https://doi.org/10.1016/j.scitotenv.2023.165007.

[5] Farkas K, Williams R, Alex-Sanders N, Grimsley JMS, Pântea I, Wade MJ, et al. Wastewater-based monitoring of SARS-CoV-2 at UK airports and its potential role in international public health surveillance. PLOS Glob Public Health 2023;3:e0001346. https://doi.org/10.1371/journal.pgph.0001346.

[6] Tay M, Lee B, Ismail MH, Yam J, Maliki D, Gin KY, et al. Usefulness of aircraft and airport wastewater for monitoring multiple pathogens including SARS-CoV-2 variants. J Travel Med 2024;31. https://doi.org/10.1093/jtm/taae074.

[7] Knight ME, Farkas K, Wade M, Webster G, Pass DA, Perry W, et al. Wastewater-based analysis of antimicrobial resistance at UK airports: Evaluating the potential opportunities and challenges. Environ Int 2025;195. https://doi.org/10.1016/j.envint.2025.109260.

[8] Saravia CJ, Zachmann K, Marquar N, Braun U, Bannick CG, Greiner T, et al. Swift Realisation of Wastewater-Based SARS-CoV-2 Surveillance for Aircraft and Airports: Challenges from Sampling to Variant Detection. Microorganisms 2025;13. https://doi.org/10.3390/microorganisms13081856.

[9] Perez-Zabaleta M, Berg C, Latorre-Margalef N, Owusu-Agyeman I, Kiyar A, Botnen H, et al. Wastewater surveillance of SARS-CoV-2 from aircraft to citywide monitoring. Nat Commun 2025;16. https://doi.org/10.1038/s41467-025-60490-1.

[10] Qvesel AG, Bennedbæk M, Larsen NB, Gunalan V, Krogsgaard LW, Rasmussen M, et al. SARS-CoV-2 Variants BQ.1 and XBB.1.5 in Wastewater of Aircraft Flying from China to Denmark, 2023. Emerg Infect Dis 2023;29:2559–61. https://doi.org/10.3201/eid2912.230717.

[11] Rector A, Karatas M, Bloemen M, De Coninck L, Swinnen J, Close L, et al. Airplane Wastewater as a Gateway for Pathogen Surveillance. SSRN 2025. https://doi.org/10.2139/ssrn.5240732.

[12] Liu Y, Smith WJM, Gebrewold M, Ashbolt NJ, Keenum I, Simpson SL, et al. Aircraft lavatory wastewater surveillance for movement of antimicrobial resistance genes: a proof-of-concept study. Microbiol Spectr 2025;13. https://doi.org/10.1128/spectrum.00569-25.

[13] Lawal O, Parreira V, Rizvi F, Precious M, Anderson R, Overton A, et al. Evaluation of sampling methods for genomic surveillance of SARS-CoV-2 variants in aircraft wastewater samples 2025. https://doi.org/10.21203/rs.3.rs-6228463/v1.

[14] Pimenta M, Alexa M, Mabandza DB, Dulaurent S, Huynh B-T, Gaschet M, et al. Wastewater-based AMR surveillance associated with tourism on a Caribbean island (Guadeloupe). J Glob Antimicrob Resist 2025;43:27–34. https://doi.org/10.1016/j.jgar.2025.03.010.

[15] Farkas K, Pellett C, Williams R, Alex-Sanders N, Bassano I, Brown MR, et al. Rapid Assessment of SARS-CoV-2 Variant-Associated Mutations in Wastewater Using Real-Time RT-PCR. Microbiol Spectr 2023;11. https://doi.org/10.1128/spectrum.03177-22.

[16] Tang M-HE, Bennedbaek M, Gunalan V, Qvesel AG, Thorsen TH, Larsen NB, et al. Variations in the persistence of 5’-end genomic and subgenomic SARS-CoV-2 RNAs in wastewater from aircraft, airports and wastewater treatment plants. Heliyon 2024;10:e29703. https://doi.org/10.1016/j.heliyon.2024.e29703.

[17] Heß S, Kneis D, Österlund T, Li B, Kristiansson E, Berendonk TU. Sewage from Airplanes Exhibits High Abundance and Diversity of Antibiotic Resistance Genes. Environ Sci Technol 2019;53:13898–905. https://doi.org/10.1021/acs.est.9b03236.

[18] Le Targa L, Wurtz N, Lacoste A, Penant G, Jardot P, Annessi A, et al. SARS-CoV-2 Testing of Aircraft Wastewater Shows That Mandatory Tests and Vaccination Pass before Boarding Did Not Prevent Massive Importation of Omicron Variant into Europe. Viruses 2022;14. https://doi.org/10.3390/v14071511.

[19] Morfino RC. Notes from the Field: Aircraft Wastewater Surveillance for Early Detection of SARS-CoV-2 Variants — John F. Kennedy International Airport, New York City, August–September 2022. MMWR Morb Mortal Wkly Rep 2023;72. https://doi.org/10.15585/mmwr.mm7208a3.

[20] Morfino R, Gawlik BM, Tavazzi S, Tessarolo A, Gutierrez AB, Madhav NK, et al. Establishing a European wastewater pathogen monitoring network employing aviation samples: a proof of concept. Hum Genomics 2025;19:24. https://doi.org/10.1186/s40246-025-00725-w.

[21] Gashegu M, Muvunyi R, Musabyimana JP, Umumararungu E, Irankunda L, Mutezemariya C, et al. Early detection of SARS-CoV-2 variants using genomic surveillance: insights from aircraft wastewater and nasal swabs at Kigali International Airport, Rwanda. IJID Reg 2025;16:100678. https://doi.org/10.1016/j.ijregi.2025.100678.

[22] Overton AK, Knapp JJ, Lawal OU, Gibson R, Fedynak AA, Adebiyi AI, et al. Genomic surveillance of Canadian airport wastewater samples allows early detection of emerging SARS-CoV-2 lineages. Sci Rep 2024;14:26534. https://doi.org/10.1038/s41598-024-76925-6.

[23] Hjelmsø MH, Mollerup S, Jensen RH, Pietroni C, Lukjancenko O, Schultz AC, et al. Metagenomic analysis of viruses in toilet waste from long distance flights—A new procedure for global infectious disease surveillance. PLOS ONE 2019;14:e0210368. https://doi.org/10.1371/journal.pone.0210368.

[24] Blaak H, Lynch G, Italiaander R, Hamidjaja RA, Schets FM, De Husman AMR. Multidrug-resistant and extended spectrum beta-lactamase-producing escherichia coli in dutch surface water and wastewater. PLoS ONE 2015;10. https://doi.org/10.1371/journal.pone.0127752.

[25] Krzysztoszek A, Gad B, Diedrich S, Böttcher S, Wieczorek M. Investigation of airport sewage to detect importation of poliovirus, Poland, 2017 to 2020. Euro Surveill 2022;27. https://doi.org/10.2807/1560-7917.ES.2022.27.24.2100674.

[26] Nkambule S, Johnson R, Mathee A, Mahlangeni N, Webster C, Horn S, et al. Wastewater-based SARS-CoV-2 airport surveillance: key trends at the Cape Town International Airport. J Water Health 2023;21:402–8. https://doi.org/10.2166/wh.2023.281.

[27] van der Drift AR, Haver A, Kloosterman A, van der Beek RFHJ, Nagelkerke E, Eggink D, et al. Long-term wastewater monitoring of SARS-CoV-2 viral loads and variants at the major international passenger hub Amsterdam Schiphol Airport: A valuable addition to COVID-19 surveillance. Sci Total Env 2024;937:173535. https://doi.org/10.1016/j.scitotenv.2024.173535.

[28] Barber CA, Chang CL, Moshi MA, Akbar S, Vo V, Oh EC, et al. Operationalizing SARS-CoV-2 wastewater monitoring to assess traveler health in Las Vegas, Nevada, USA. IJID Reg 2025;15:100619. https://doi.org/10.1016/j.ijregi.2025.100619.

[29] Agrawal S, Orschler L, Tavazzi S, Greither R, Gawlik BM, Lackner S. Genome Sequencing of Wastewater Confirms the Arrival of the SARS-CoV-2 Omicron Variant at Frankfurt Airport but Limited Spread in the City of Frankfurt, Germany, in November 2021. Microbiol Resour Announc 2022;11. https://doi.org/10.1128/MRA.01229-21.

[30] Zdenkova K, Bartackova J, Cermakova E, Demnerova K, Dostalkova A, Janda V, et al. Monitoring COVID-19 spread in Prague local neighborhoods based on the presence of SARS-CoV-2 RNA in wastewater collected throughout the sewer network. Water Res 2022;216. https://doi.org/10.1016/j.watres.2022.118343.

[31] de Jonge EF, Peterse CM, Koelewijn JM, van der Drift A-MR, van der Beek RFHJ, Nagelkerke E, et al. The detection of monkeypox virus DNA in wastewater samples in the Netherlands. Sci Total Environ 2022;852. https://doi.org/10.1016/j.scitotenv.2022.158265.

[32] Tang ME, Bennedbaek M, Gunalan V, Qvesel AG, Thorsen TH, Larsen NB, et al. Variations in the persistence of 5’-end genomic and subgenomic SARS-CoV-2 RNAs in wastewater from aircraft, airports and wastewater treatment plants. Heliyon 2024;10:e29703. https://doi.org/10.1016/j.heliyon.2024.e29703.
